# Supplementary material for: New zinc complexes derived from “self-adaptable” acyclic diiminodipyrromethanes as potent catalysts for the reduction of curing temperature of bisphenol-A/F benzoxazines
Source: Royal Society of Chemistry journal article supplement (doi:10.1039/d0ra07837a), 2020-01-01
Supplement: d0ra07837a1.pdf [file d0ra07837a1.pdf]

*Supporting Information*

**New zinc complexes derived from “self-adaptable” acyclic diiminodipyrromethanes as potent catalysts for the reduction of curing temperature of bisphenol-A/F benzoxazines**

Shiva K. Loke, Eswar Pagadala, S. Devaraju, V. Srinivasadesikan and Ravi K. Kottalanka\*

*Division of Chemistry, Department of Sciences and Humanities, Vignan’s Foundation for Science Technology and Research (Deemed to be University), Vadlamudi, Guntur-522213, Andhra Pradesh, India. Email: [ravikottalanka@gmail.com](mailto:ravikottalanka@gmail.com); Fax: +91(863) 2344 707; Tel: +91(863) 2344 700*

**List of Contents:**

Figure-S1: ORTEP diagram of acyclic diiminodipyrromethane Schiff base **2a** with thermal displacement parameters drawn at the 30% probability level.

Figure-S2: ESP diagram of diiminodipyrromethane ligand **2b** and **2b-I**.

Figure-S3: DSC curing thermogram of BA-a benzoxazine with 3% (left) and 5% (right) zinc catalysts (**3** and **4**).

Figure-S4: DSC curing thermogram of BF-a benzoxazine with 3% (left) and 5% (right) zinc catalysts (**3** and **4**).

Figure-S5: IR-Spectra of benzoxazine monomers and PBz’s with and without catalysts.

Figure-S6: TGA thermograms of PBA-a, PBF-a, [Zn(2a)<sub>2</sub>] (**3**) and [Zn(2b-I)Cl<sub>2</sub>] (**4**).

Table 1: Crystallographic information of acyclic Schiff base (**2a**), zinc complexes (**3**) and (**4**).

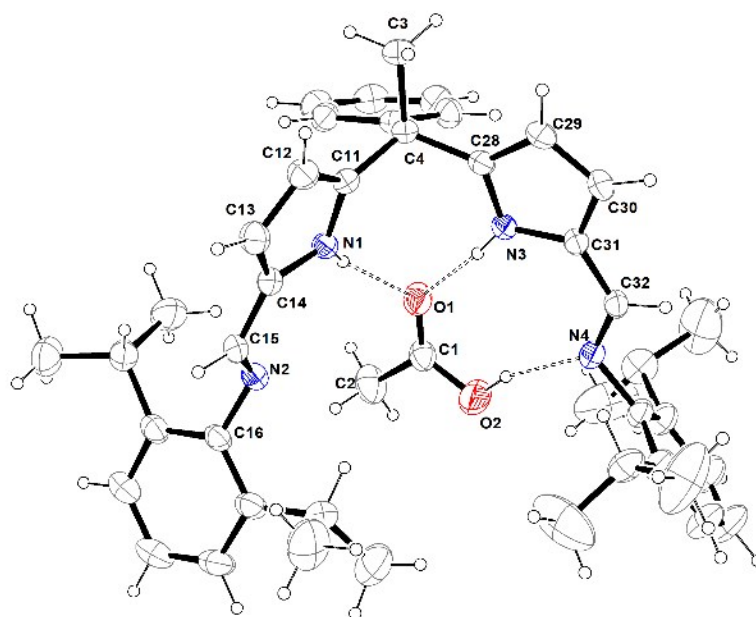

Figure S1: ORTEP diagram of acyclic diiminodipyrromethane Schiff base **2a** with thermal displacement parameters drawn at the 30% probability level. Selected bond lengths [Å] and bond angles[°]: C1–C2 1.484(4), C3–C4 1.543(3), C4–C11 1.513(3), C11–C12 1.369(3), C12–C13 1.394(4), C13–C14 1.364(4), C14–N1 1.369(3), C11–N1 1.364(3), C14–C15 1.439(4), C15–N2 1.264(3), C16–N2 1.424(3), C4–C28 1.515(3), C28–C29 1.377(3), C29–C30 1.392(4), C30–C31 1.373(3), C31–N3 1.370(3), C28–N3 1.359(3), C31–C32 1.419(3), C32–N4 1.271(3), C33–N4 1.435(3), C1–O1 1.199(3), C1–O2 1.299(4); O1–C1–O2 122.2(3), O1–C1–C2 123.5(3), O2–C1–C2 114.3(3), C11–C4–C28 109.72(19), C3–C4–C5 107.1(2), C3–C4–C11 108.7(2), C3–C4–C28 109.0(2), C4–C11–N1 122.6(2), C4–C28–N3 122.5(2), C11–N1–C14 110.2(2), N1–C14–C15 122.6(2), N1–C14–C13 106.7(2), C14–C15–N2 122.3(2), C15–N2–C16 119.8(2), C4–C28–N3 122.5(2), C4–C28–C29 130.4(2), C28–N3–C31 110.2(2), N3–C31–C32 125.9(2), C30–C31–C32 127.3(2), C31–C32–N4 127.6(2), C32–N4–C33 118.5(2).

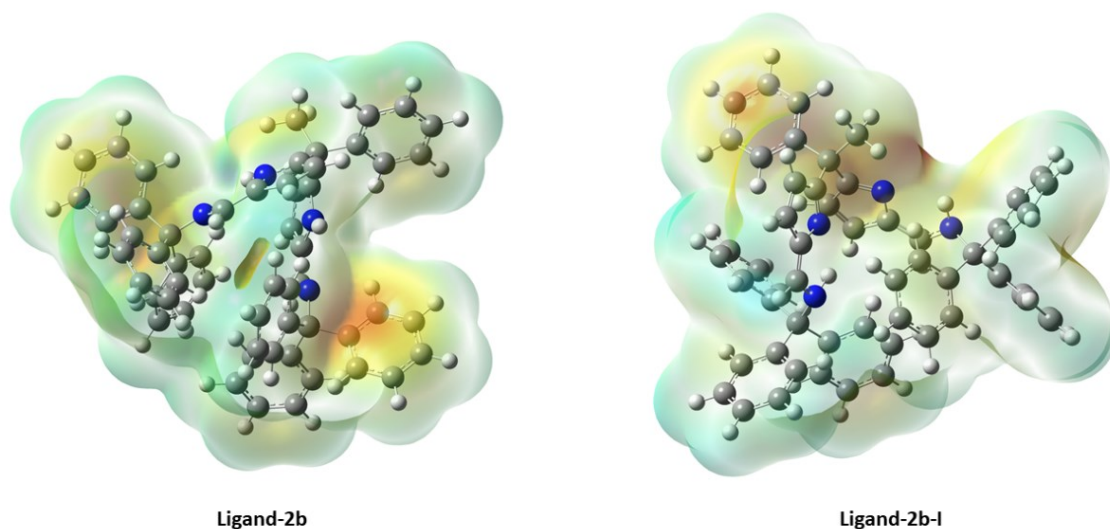

Figure-S2: ESP diagram of diiminodipyrromethane ligand **2b** and **2b-I**.

#### Typical procures for ROP of Benzoxazines:

Bisphenol-A (90 mg, 0.20 mmol) or Bisphenol-F (90 mg, 0.19 mmol) benzoxazine was mixed with 10% catalytic amount of Zinc complex **3** or **4** by physical grinding in a mortar with a pestle at room temperature for 20 min. to obtain a homogeneous mixture. After that 5.0 mg of the mixture was taken and placed in an aluminium pan and heated in the DSC instrument to obtain the corresponding heat evolution profile.

#### Curing process:

According to the DSC data , the remaining mixture was placed in a glass vial and it is introduced to time dependent temperature adjustable hydrothermal oven. Initially the oven temperature set it to be at room temperature gradually enhanced to its maximum curing temperature with respect to time. After 24 h we will get poly-benzoxazine as a product. The 5.0 mg of the resulted poly-benzoxazine was

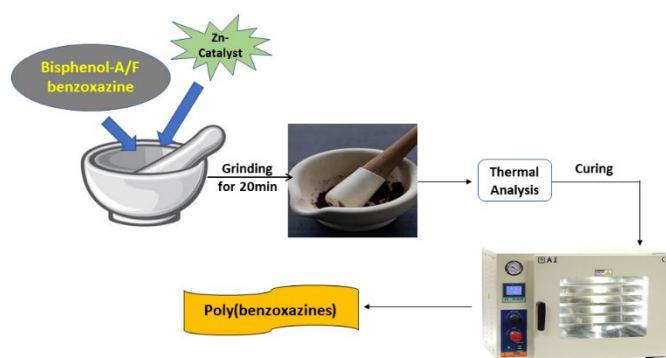

placed in aluminium pan and heated in the DSC and TG instrument to study their heat evaluation profile and temperature-dependent weight loss and to see the improvement in residual char yield percentage.

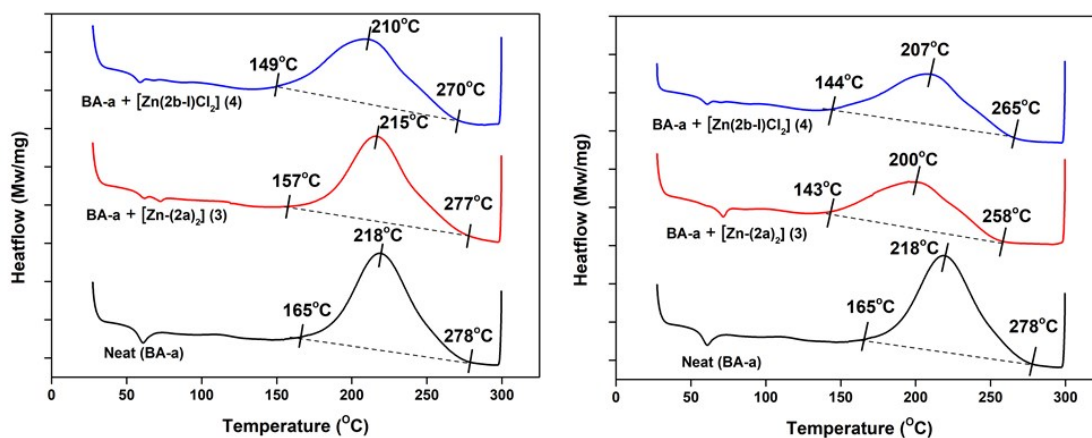

Figure-S3: DSC curing thermogram of BA-a benzoxazine with 3% (left) and 5% (right) zinc catalysts (3 and 4).

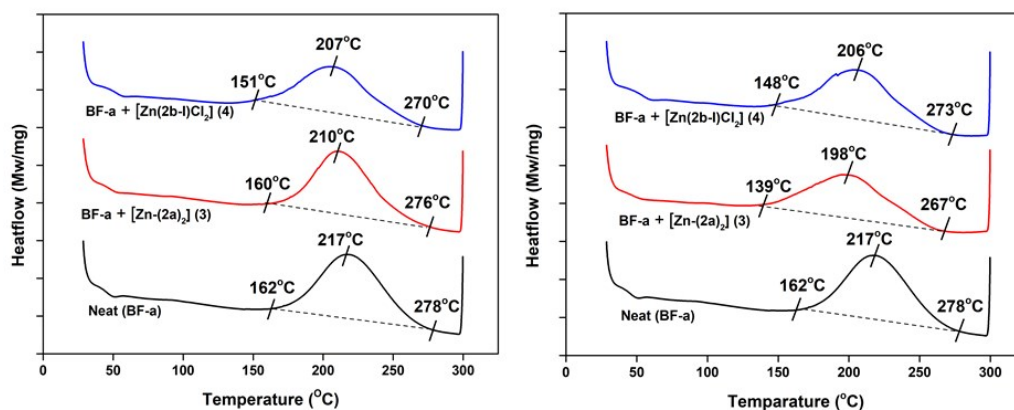

Figure-S4: DSC curing thermogram of BF-a benzoxazine with 3% (left) and 5% (right) zinc catalysts (3 and 4).

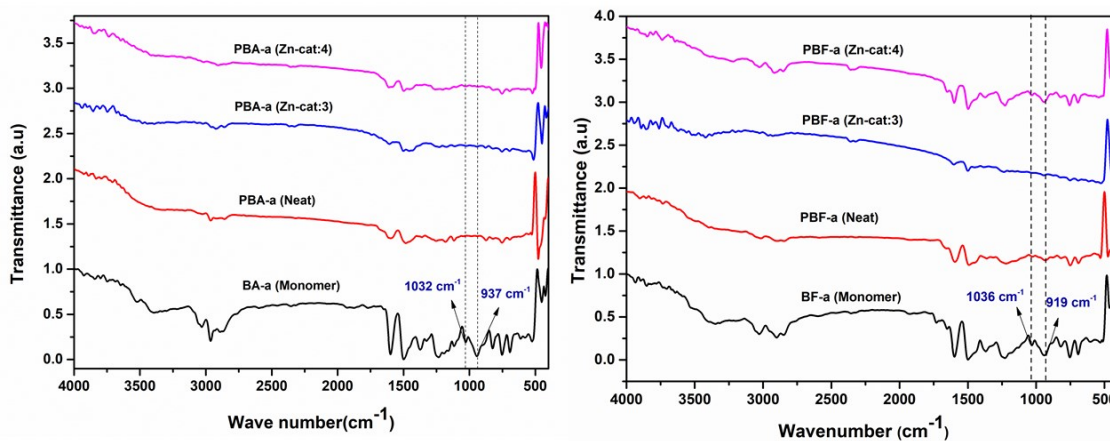

Figure-S5: IR-Spectra of benzoxazine monomers and PBz's with and without catalysts.

| Crystal                                             | <b>2a</b>                                                          | <b>3</b>                                                            | <b>4</b>                                                                          |
|-----------------------------------------------------|--------------------------------------------------------------------|---------------------------------------------------------------------|-----------------------------------------------------------------------------------|
| Table                                               |                                                                    |                                                                     |                                                                                   |
| CCDC No.                                            | 1939817                                                            | 1900503                                                             | 1902678                                                                           |
| Empirical formula                                   | C <sub>44</sub> H <sub>54</sub> N <sub>4</sub> O <sub>2</sub>      | C <sub>84</sub> H <sub>98</sub> N <sub>8</sub> Zn <sub>1</sub>      | C <sub>63</sub> H <sub>54</sub> N <sub>4</sub> Cl <sub>2</sub><br>Zn <sub>1</sub> |
| Formula weight                                      | 669.90                                                             | 1285.07                                                             | 1003.46                                                                           |
| <i>T</i> (K)                                        | 298(2)                                                             | 298.15                                                              | 298.15                                                                            |
| $\lambda$ (Å)                                       | 0.71073                                                            | 1.54184                                                             | 1.54184                                                                           |
| Crystal system                                      | Triclinic                                                          | Monoclinic                                                          | Triclinic                                                                         |
| Space group                                         | <i>P</i> -1                                                        | <i>P</i> 2 <sub>1</sub> / <i>c</i>                                  | <i>P</i> -1                                                                       |
| <i>a</i> (Å)                                        | 12.0275(7)                                                         | 13.06630(10)                                                        | 11.8769(3)                                                                        |
| <i>b</i> (Å)                                        | 12.8465(6)                                                         | 12.93910(10)                                                        | 13.4192(4)                                                                        |
| <i>c</i> (Å)                                        | 14.5982(8)                                                         | 46.6200(5)                                                          | 17.2498(4)                                                                        |
| $\alpha$ (°)                                        | 104.022(4)                                                         | 90                                                                  | 85.646(2)                                                                         |
| $\beta$ (°)                                         | 93.333(5)                                                          | 98.0010(10)                                                         | 89.156(2)                                                                         |
| $\gamma$ (°)                                        | 108.901(4)                                                         | 90                                                                  | 73.944(3)                                                                         |
| <i>V</i> (Å <sup>3</sup> )                          | 2047.3(2)                                                          | 7805.14(12)                                                         | 2634.32(13)                                                                       |
| <i>Z</i>                                            | 2                                                                  | 4                                                                   | 2                                                                                 |
| <i>D</i> <sub>calc</sub> g cm <sup>-3</sup>         | 1.087                                                              | 1.094                                                               | 1.2650                                                                            |
| $\mu$ (mm <sup>-1</sup> )                           | 0.067                                                              | 0.784                                                               | 1.911                                                                             |
| <i>F</i> (000)                                      | 722.0                                                              | 2752.0                                                              | 1048.9                                                                            |
| Theta range for data collection                     | 4.292 to 58.354 deg.                                               | 6.832 to 148.74 deg.                                                | 8.28 to 148.94 deg.                                                               |
| Limiting indices                                    | -15 ≤ <i>h</i> ≤ 15,<br>16 ≤ <i>k</i> ≤ 16,<br>-18 ≤ <i>l</i> ≤ 19 | -16 ≤ <i>h</i> ≤ 16,<br>-16 ≤ <i>k</i> ≤ 16,<br>-47 ≤ <i>l</i> ≤ 58 | -11 ≤ <i>h</i> ≤ 14,<br>-13 ≤ <i>k</i> ≤ 16,<br>-20 ≤ <i>l</i> ≤ 21               |
| Reflections collected / unique                      | 15950 / 9346<br>[ <i>R</i> (int) = 0.0270]                         | 88203 [ <i>R</i> (int) = 0.0386]                                    | 26749<br>[ <i>R</i> (int) = 0.0283]                                               |
| Completeness to theta = 74.37                       | 99.3 %                                                             | 88.1 %                                                              | 95.4 %                                                                            |
| Absorption correction                               | Multi-Scan                                                         | Multi-Scan                                                          | Multi-Scan                                                                        |
| Refinement method                                   | Full-matrix least-squares on <i>F</i> <sup>2</sup>                 | Full-matrix least-squares on <i>F</i> <sup>2</sup>                  | Full-matrix least-squares on <i>F</i> <sup>2</sup>                                |
| Data / restraints / parameters                      | 9346 / 0 / 463                                                     | 14046 / 0 / 826                                                     | 10280 / 0 / 680                                                                   |
| Goodness-of-fit on <i>F</i> <sup>2</sup>            | 1.042                                                              | 1.004                                                               | 1.041                                                                             |
| Final <i>R</i> indices [ <i>I</i> > 2σ( <i>I</i> )] | <i>R</i> <sub>1</sub> = 0.0744,<br><i>wR</i> <sub>2</sub> = 0.1677 | <i>R</i> <sub>1</sub> = 0.0553,<br><i>wR</i> <sub>2</sub> = 0.1332  | <i>R</i> <sub>1</sub> = 0.0576,<br><i>wR</i> <sub>2</sub> = 0.1512                |
| <i>R</i> indices (all data)                         | <i>R</i> <sub>1</sub> = 0.1384,<br><i>wR</i> <sub>2</sub> = 0.2128 | <i>R</i> <sub>1</sub> = 0.0585,<br><i>wR</i> <sub>2</sub> = 0.1361  | <i>R</i> <sub>1</sub> = 0.0642,<br><i>wR</i> <sub>2</sub> = 0.1560                |
| Largest diff. peak and hole                         | 0.33 and -0.18 e.Å <sup>-3</sup>                                   | 1.29 and -0.74 e.Å <sup>-3</sup>                                    | 1.29 and -0.87 e.Å <sup>-3</sup>                                                  |

Crystallographic information of acyclic Schiff base (**2a**), zinc complexes (**3**) and (**4**).
